# Supplementary figures and images for: Caffeic Acid and Metformin Inhibit Invasive Phenotype Induced by TGF-β1 in C-4I and HTB-35/SiHa Human Cervical Squamous Carcinoma Cells by Acting on Different Molecular Targets
Source: MDPI journal article supplement (doi:10.3390/ijms19010266), 2018-01-16

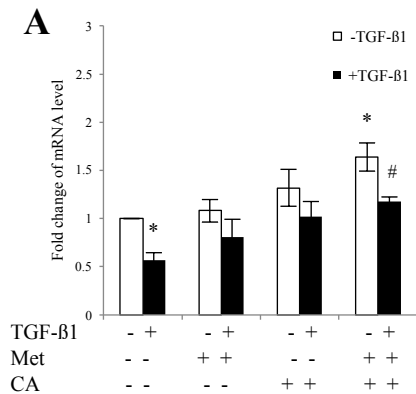

*CDH1*

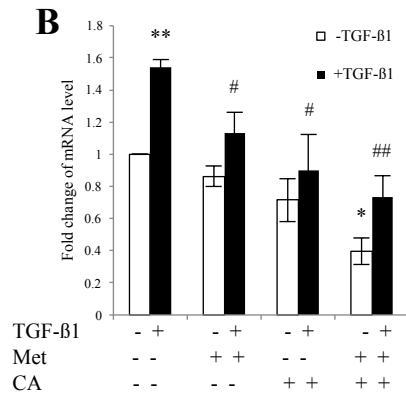

*SNAIL*

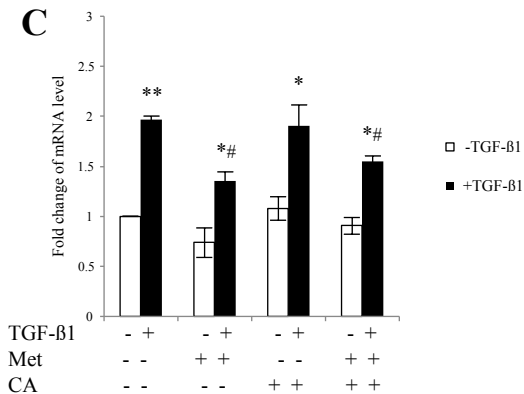

*VIM1*

Supplement: s1 [file s1]

**- TGF- $\beta$ 1****A**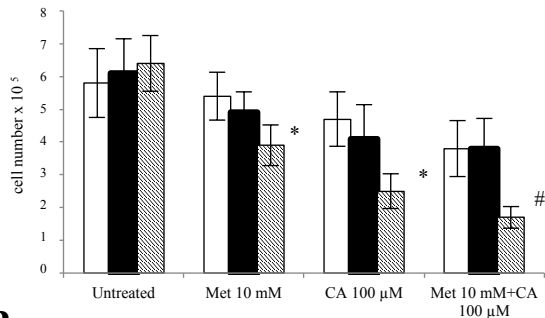**+ TGF- $\beta$ 1**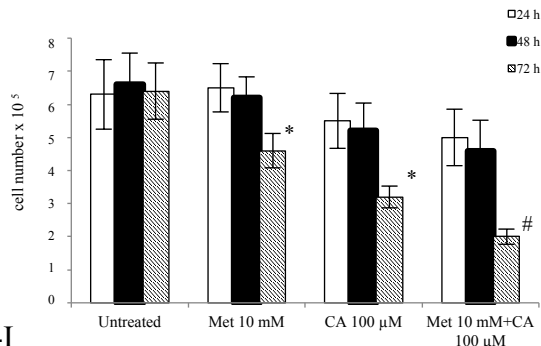**C4-I****B**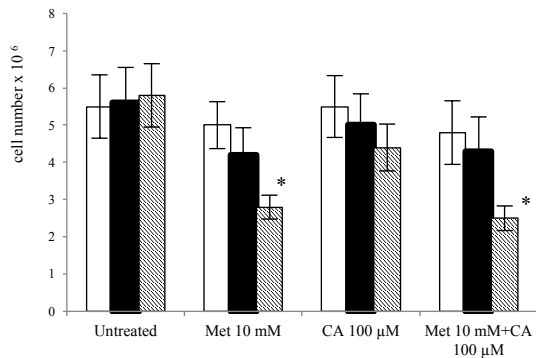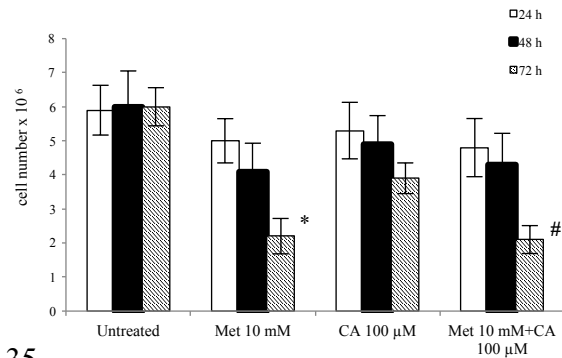**HTB-35**

Supplement: s1 [file s1]
